# Supplementary material
Source: PubMed Central journal article supplement (PMC2854097)

**Table S1. Primers used to generate constructs**

| <b>Constructs</b>           | <b>Primers</b>                                                                            |
|-----------------------------|-------------------------------------------------------------------------------------------|
| pB42AD-Tmp21 (aa 108-208):  |                                                                                           |
| Forward:                    | ccggaattctgttttgagagcaaggggaacaggg                                                        |
| Reverse:                    | ccgctcgagcaggtagaagacctgccag                                                              |
| pB42ADTmp21 (aa108-185):    |                                                                                           |
| Forward:                    | ccggaattctgttttgagagcaaggggaacaggg                                                        |
| Reverse:                    | ccgctcgagccgagtgtttggtgactcgttgg                                                          |
| pB42ADTmp21 (aa183-211):    |                                                                                           |
| Forward:                    | ggaattcgtcctatacttcagcatcttttcaatgttctgtctcattggactagctacct<br>ggcaggtcttctacctgctcgagcgg |
| Reverse:                    | ccttaagcaggatatgaagtcgtagaaaagttacaagacagagtaacctgatcgatgga<br>ccgtccagaagatggacgagctcgcc |
| pEBG-Tmp21/p23 (aa 1-219)   |                                                                                           |
| Forward:                    | ccgctcgaggatccatgtctgggttctgctggccc                                                       |
| Reverse:                    | gactagtctactcaatcaatttcttgccc                                                             |
| pEBG-Tmp21/p23 (aa 108-219) |                                                                                           |
| Forward:                    | gaagatctctcgaggatccatgtggtttgagagcaaggg                                                   |
| Reverse:                    | gactagtctactcaatcaatttcttgccc                                                             |
| pEBG-Tmp21/p23 (aa 1-208)   |                                                                                           |
| Forward:                    | ccgctcgaggatccatgtctgggttctgctggccc                                                       |
| Reverse:                    | gactagtctagcgtcgcaggtagaagacc                                                             |
| pEBG-Tmp21/p23 (aa 1-185)   |                                                                                           |
| Forward:                    | ccgctcgaggatccatgtctgggttctgctggccc                                                       |
| Reverse:                    | gactagtctaccgagtggttggtgactcg                                                             |
| PKC $\alpha$ C1a-b          |                                                                                           |
| Forward                     | ccggaattcatggctgacgttttcccgggcaacga                                                       |
| Reverse                     | cgcggatccctaaacctcagcctttaggtaaatcc                                                       |
| PKC $\epsilon$ C1a-b        |                                                                                           |
| Forward                     | ccggaattctcgtcgggtgaagcccctaaagacaatg                                                     |
| Reverse                     | cgcggatccctaggtaaacgccagggtcggccagtagtctttg                                               |
| PKC $\delta$ C1a-b          |                                                                                           |
| Forward                     | ccggaattcgaggacgtggattgcaaacagtctatg                                                      |
| Reverse                     | cgcggatccctatctctgggtgacttggttcaaggcct                                                    |
| PKC $\zeta$ C1              |                                                                                           |
| Forward                     | ccggaattcgttttcccgagcaccctgagcagcctg                                                      |
| Reverse                     | cgcggatccctaaagactctgccccagggttaagcaaatc                                                  |
| RasGRP1 C1                  |                                                                                           |
| Forward                     | ccggaattcttctgtgtgatggacaaagatagg                                                         |
| Reverse                     | cgcggatcccacagagctgatgttttctgtgg                                                          |
| $\beta$ 2-chimaerin C1      |                                                                                           |
| Forward                     | ccggaattcaaaacaaacgtcacacatgaagaacacacagc                                                 |
| Reverse                     | cgcggatccctatggttgtaggtcacaacagtagact                                                     |
| PKC $\epsilon$ C1a          |                                                                                           |
| Forward                     | gaattcaacggccacaagttcatg                                                                  |
| Reverse                     | ggatccccagcacactttgtgatta                                                                 |
| PKC $\epsilon$ C1b          |                                                                                           |
| Forward                     | gaattcatgccccacaagttcggtat                                                                |
| Reverse                     | ggatcccactccacagttgggag                                                                   |

**SUPPLEMENTARY FIGURE LEGENDS**

**Figure S1.** *Binding of C1 domains to p23/Tmp21.* EGY48 yeast (containing 8op-LacZ vector) was co-transformed with pLexA-fused C1 domains from PKC $\alpha$  (C1 $\alpha$ a-b), PKC $\epsilon$  (C1 $\epsilon$ a-b), PKC $\delta$  (C1 $\delta$ a-b), PKC $\zeta$  (C1 $\zeta$ ), RasGRP1 (C1RasGRP1), or  $\beta$ 2-chimaerin (C1 $\beta$ 2-ch), and pB42AD-HA-tagged p23/Tmp21 (aa 108-208). **A.** Alignment of PKC $\alpha$ , PKC $\delta$ , PKC $\epsilon$  C1b, RasGRP1, and  $\beta$ 2-chimaerin C1 domains. Positions 15 and 36 in C1 domains are indicated with arrows. **B.** Schematic representation of C1 domains fused to pLexA. **C.** Assay of  $\beta$ -galactosidase activity on induction (*upper panel*) or no-induction (*lower panel*) plates, carried out 72 h after transformation. *Gal/Raf*, galactosidase/raffinose. Two additional experiments gave similar results. **D.** HeLa cells were co-transfected with plasmids encoding GFP-PKC $\alpha$ , GFP-PKC $\delta$ , GFP-PKC $\epsilon$ , GFP-RasGRP1 or GFP- $\beta$ 2-chimaerin, and pcDNA3.1-V5-p23/Tmp21. Forty-eight h later, cells were fixed and co-localization examined by confocal microscopy. *Bar*, 10  $\mu$ m. All experiments have been performed at least three times with similar results.

**Figure S2.** *FBS and EGF enhance the association of  $\beta$ 2-chimaerin with p23/Tmp21.* COS-1 cells were co-transfected with pEBG-p23/Tmp21 and GFP- $\beta$ 2-chimaerin, and 48 h later either serum-starved for 18 h and stimulated with EGF (100 ng/ml) or left in 10% FBS. GST-p23/Tmp21 was precipitated with glutathione Sepharose 4B beads and associated GFP- $\beta$ 2-chimaerin detected by Western blot using an anti-GFP antibody. A representative example is shown together with a densitometric analysis of 3 independent experiments. \*P<0.05 between control (0 min.) vs. treatments.

**Figure S3.** *Co-localization of  $\beta$ 2-chimaerin with a Golgi marker.* HeLa (CTL), HeLa (shRNA#2) or HeLa (shRNA#3) cells were transfected with pEGFP- $\beta$ 2-chimaerin and 48 h later treated with vehicle or PMA (3  $\mu$ M) in the presence of GF109203X (5  $\mu$ M). After 30 min., cells were fixed, stained with anti-GS28 cis-Golgi marker and examined by confocal microscopy. Co-localization images and Pearson's correlation coefficient (Rr) were generated by Image J. Similar results were observed in 3 separate experiments. *Bar*, 10  $\mu$ m.

**Figure S4.** *PKC $\epsilon$  (Asp257/Met278) does not co-localize with p23/Tmp21.* HeLa cells were co-transfected with either pEGFP-PKC $\epsilon$  (wt) or pEGFP-PKC $\epsilon$  (Asp257/Met278) and pcDNA3.1/V5-p23/Tmp21 (full-length). Forty-eight h later, cells were treated with PMA (1  $\mu$ M) or vehicle for 30 min, fixed, and visualized by confocal microscopy. *Upper panels*, green fluorescence from GFP-PKC $\epsilon$  or GFP-PKC $\epsilon$  (Asp257/Met278); *middle panels*, red fluorescence from pcDNA3.1/V5-p23/Tmp21; *lower panels*, overlapped images. *Bar*, 10  $\mu$ m. Similar results were obtained in 3 independent experiments. Peripheral localization is marked with arrows.

**Figure S5.** *Videos for translocation experiments in Fig. 5B.* Time-lapse images of translocation of GFP- $\beta$ 2-chimaerin or its mutants in living cells were captured by fluorescence microscopy at different time points after PMA treatment. AVI files (movies) were made using Northern Eclipse software (version 6.0).

# Figure S1

**A**

1                    10                    ↓                    20                    30                    ↓                    40                    50

HKFKIHTYGSPTFCDDHCGSLLYGLIHQGMKCDTCDMNVHKQCVINVPSLC PKC $\alpha$  C1b  
 HRFKVHNYMSPTFCDDHCGSLLWGLVKQGLKCEDCGMNVHVKCREKVANLC PKC $\delta$  C1b  
 HKFGIHNYKVPTFCDDHCGSLLWGLLRQGLQCKVCKMNVHRRRCETNVAPNC PKC $\epsilon$  C1b  
 HNFQETTYLKPTFCDDNCAGFLWGVIKQGYRCKDCGMNCHKQCKDLVVFEFC RasGRP1 C1  
 HNFKVHTFRGPHWCEYCANFMWGLIAQGVRCSDCGLNVHKQCSKHVPND  $\beta$ -chimaerin C1

**B**

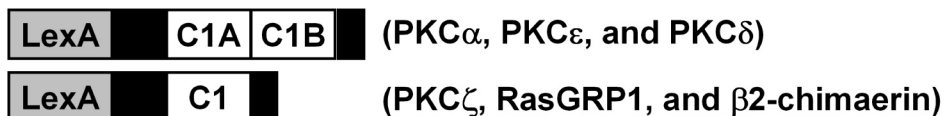

**C**

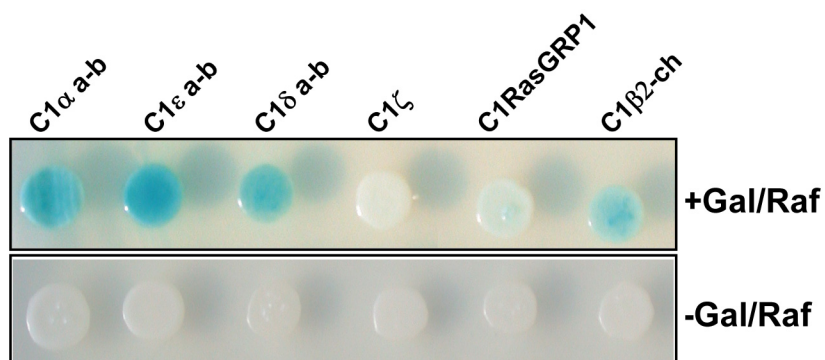

**D**

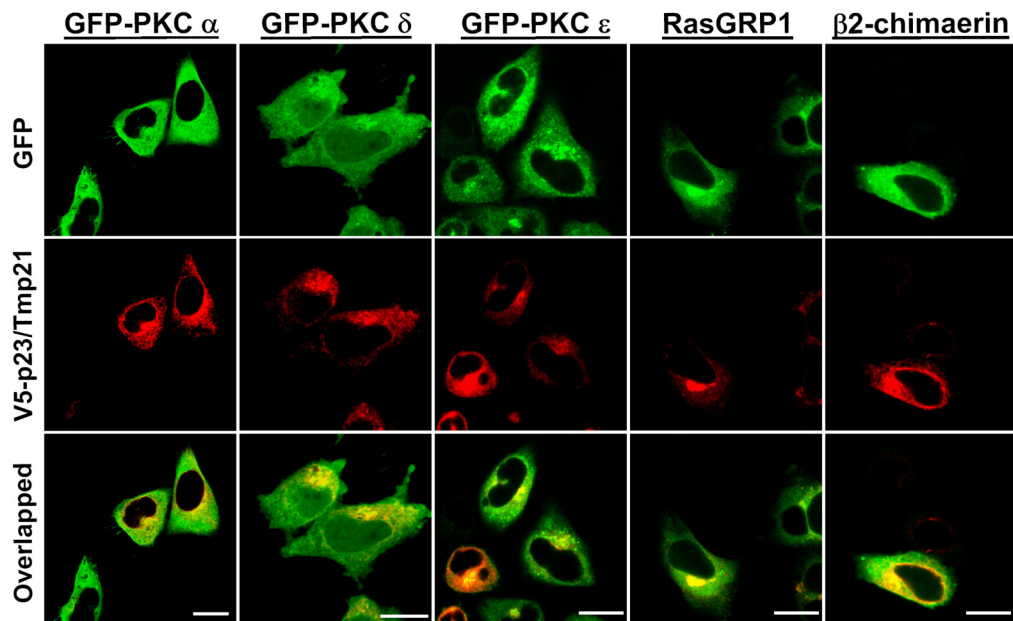

# Figure S2

## A

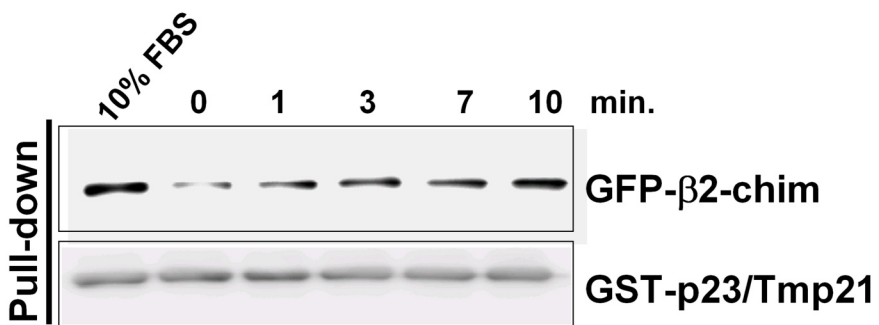

## B

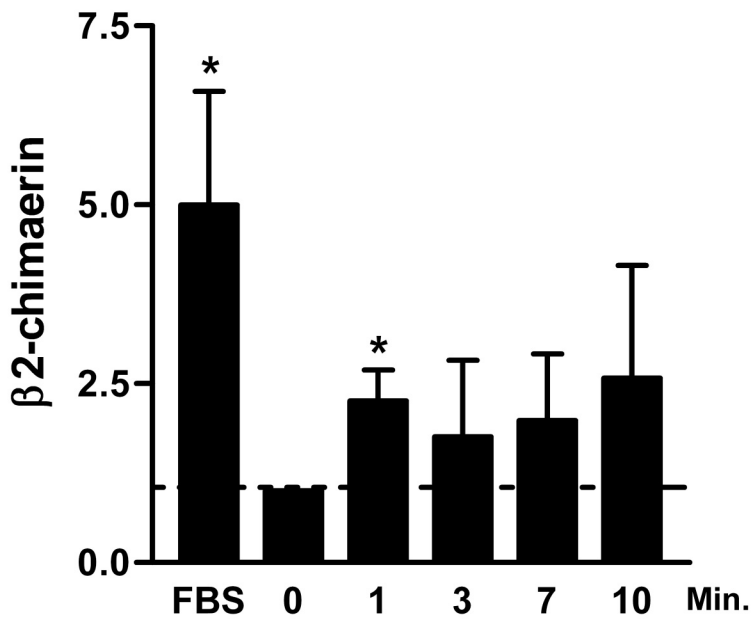

**Figure S3**

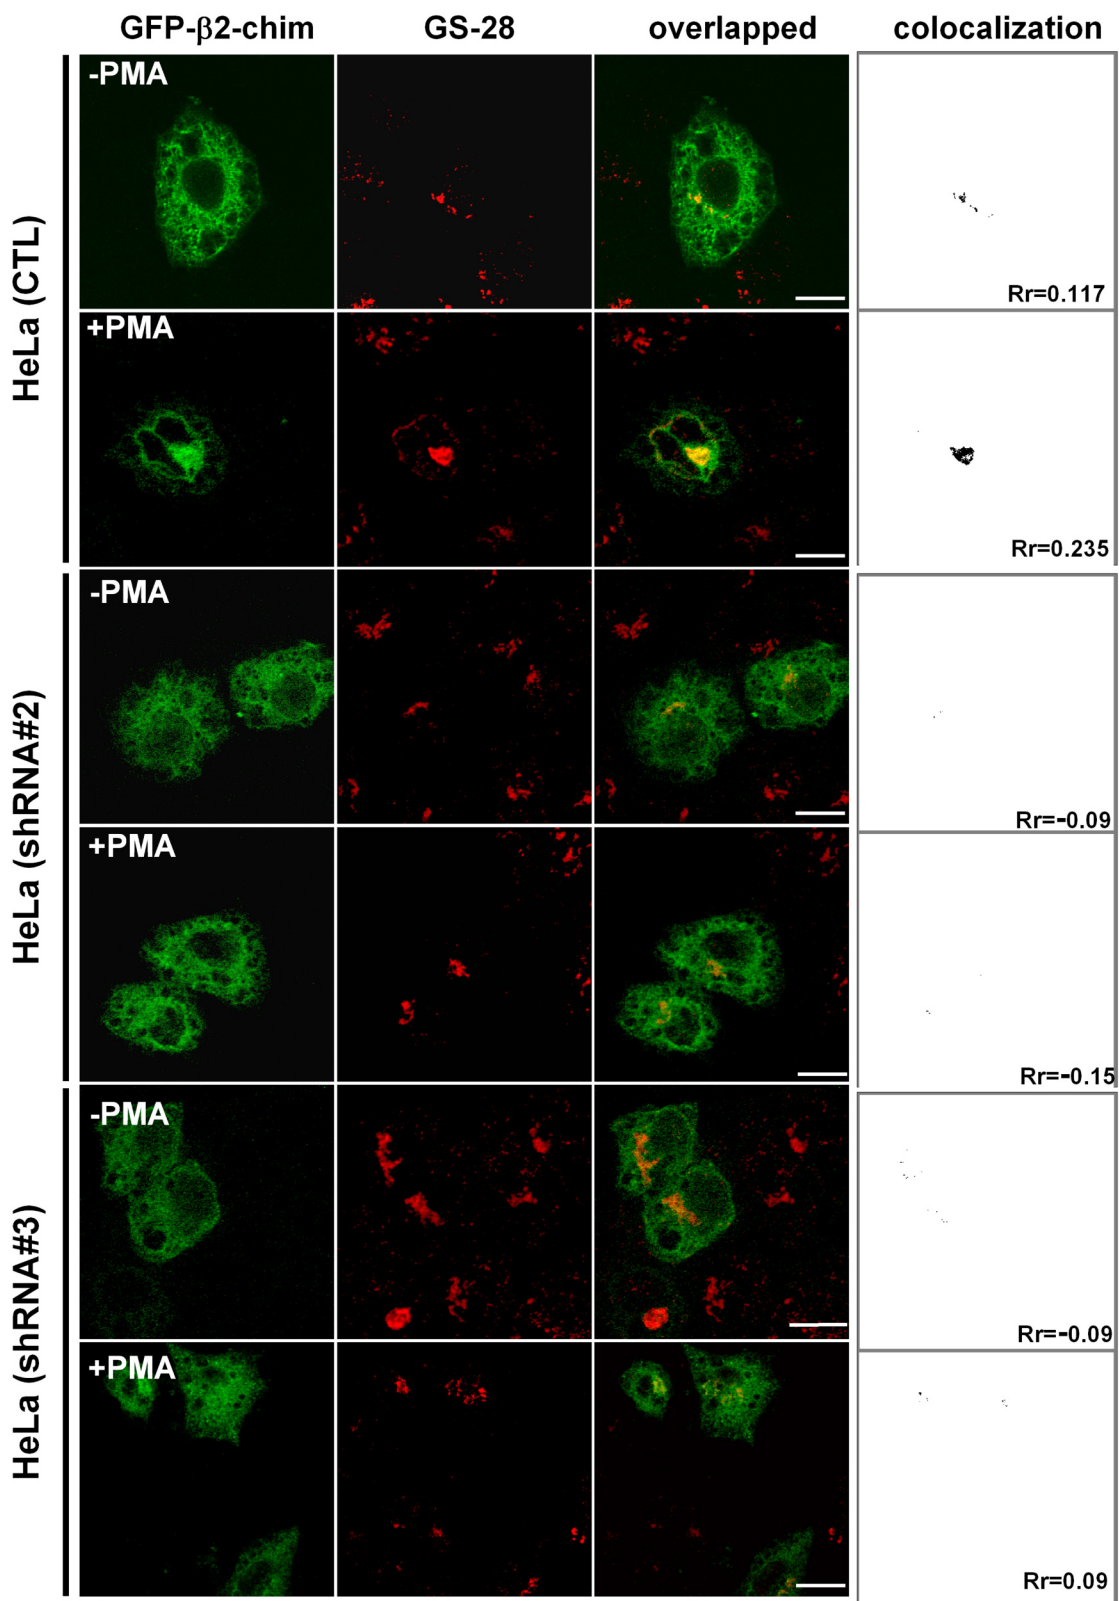

**Figure S4**

**PKC $\epsilon$  (wt)**

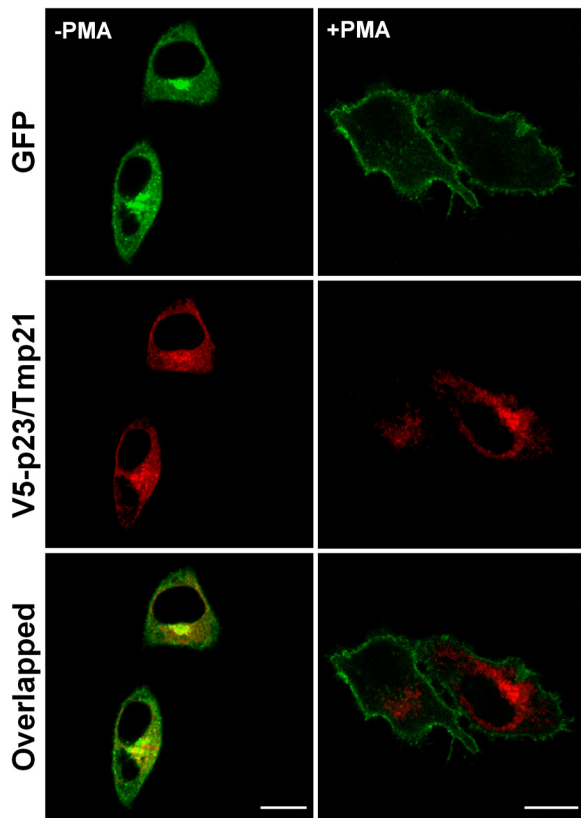

**PKC $\epsilon$  (Asp257/Met278)**

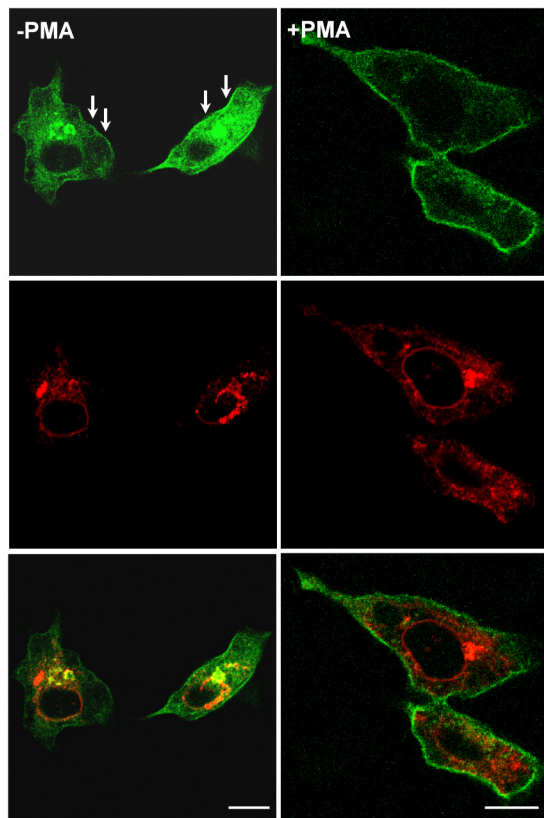

Supplement: E09-08-0735_1.pdf [file E09-08-0735_1.pdf]
